# Supplementary material for: G protein β5-ATM complexes drive acetaminophen-induced hepatotoxicity
Source: PubMed Central journal article supplement — Redox Biol. 2021 Apr 28;43:101965. doi: 10.1016/j.redox.2021.101965 (PMC8105674; doi:10.1016/j.redox.2021.101965), 2021-04-28
Supplement: mmc2.pdf [file mmc2.pdf]

**Title: G protein  $\beta_5$ -ATM complexes drive acetaminophen-induced hepatotoxicity**

Arnab Pramanick<sup>1¶</sup>, Sreemoyee Chakraborti<sup>1¶</sup>, Tarun Mahata<sup>1¶</sup>, Madhuri Basak<sup>1¶</sup>, Kiran Das<sup>1</sup>, Sumit Kumar Verma<sup>1</sup>, Abhishek Singh Sengar<sup>1</sup>, Praveen Kumar Singh<sup>2</sup>, Pranesh Kumar<sup>3</sup>, Bolay Bhattacharya<sup>4</sup>, Sayan Biswas<sup>5</sup>, Parag Baran Pal<sup>5</sup>, Subhasish Sarkar<sup>6</sup>, Vinita Agrawal<sup>7</sup>, Sudipta Saha<sup>3</sup>, Debjani Nath<sup>8</sup>, Suvro Chatterjee<sup>9</sup>, Adele Stewart<sup>10</sup>, Biswanath Maity<sup>1\*</sup>

<sup>1</sup>Centre of Biomedical Research, Sanjay Gandhi Post-Graduate Institute of Medical Sciences campus, Raebareli Road, Lucknow, Uttar Pradesh 226014, India

<sup>2</sup>Department of Surgery, Millers School of Medicine, University of Miami, Miami, FL 33136, USA

<sup>3</sup>Department of Pharmaceutical Sciences, Babasaheb Bhimrao Ambedkar University, Vidya Vihar, Raebareli Road, Lucknow, Uttar Pradesh 226025, India

<sup>4</sup>Department of Pharmacy, Geethanjali College of Pharmacy, Cheeryala, Keesara(M), Rangareddy District, Telangana 501301, India

<sup>5</sup>Department of Forensic Medicine, College of Medicine and Sagore Dutta Hospital, B.T. Road, Kamarhati, Kolkata, West Bengal 700058, India

<sup>6</sup>Department of Surgery, College of Medicine and Sagore Dutta Hospital, B.T. Road, Kamarhati, Kolkata, West Bengal 700058, India

<sup>7</sup>Department of Pathology, Sanjay Gandhi Post-Graduate Institute of Medical Sciences (SGPGIMS), Raebareli Road, Lucknow, Uttar Pradesh 226014, India

<sup>8</sup>Department of Zoology, University of Kalyani, Nadia, West Bengal 741235, India

<sup>9</sup>Department of Biotechnology, Anna University and Vascular Biology Laboratory, AU-KBC Research Centre, MIT Campus, Chennai 600044, India

<sup>10</sup>Department of Biomedical Science, Charles E. Schmidt College of Medicine, Florida Atlantic University, Jupiter, FL 33458, USA

¶ Equal contribution

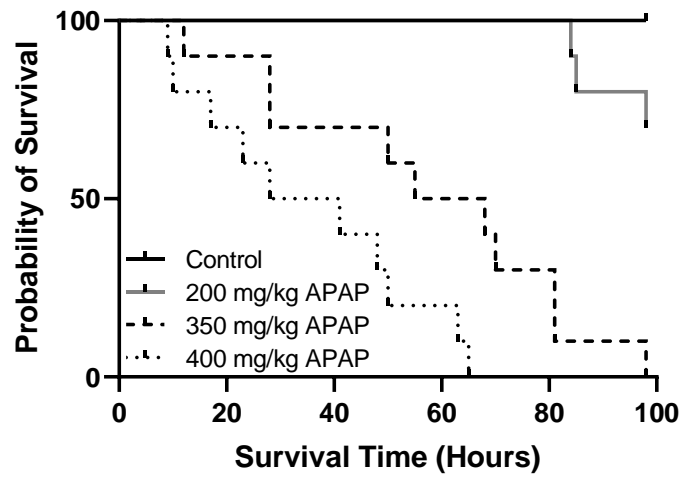

**Fig. S1. Acute APAP dose response.** Wild-type (WT) mice (n=10) were given a single injection of APAP (200, 350 or 400 mg/kg, i.p.) or vehicle (control). Kaplan-Meier survival curves are depicted tracking animal survival up to 96 hours post-drug administration.

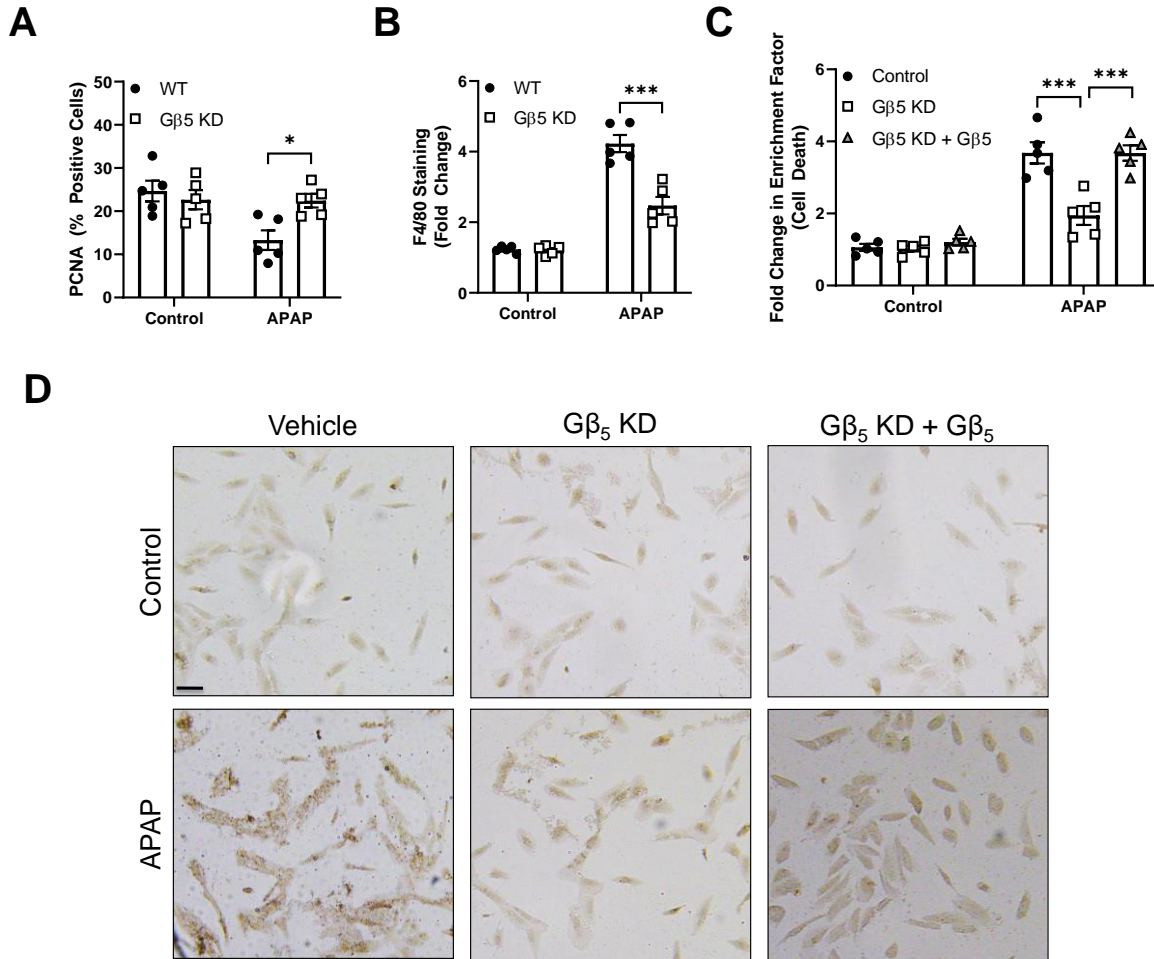

**Fig. S2. Gβ<sub>5</sub> promotes inflammation and cell death and suppresses proliferation in APAP-exposed murine hepatocytes.** Primary hepatocytes were isolated from WT or Gβ<sub>5</sub> KD mice and exposed to APAP in culture (5 mM). For a subset of experiments, Gβ<sub>5</sub> expression was restored via transfection. (A) Hepatocyte proliferation as determined by % total cells positive for PCNA staining (n=5). (B) Inflammation as determined by fold change in F4/80 staining (n=5). (C) Cell death (fold increase in cytoplasmic histone-associated DNA fragments) (n=5). (D) TUNEL staining (quantified in Fig. 4J) [scale bar = 100μm]. \**P*<0.05, \*\*\**P*<0.001 via two-way ANOVA with Sidak's post-hoc test. Data are presented as mean ± SEM.

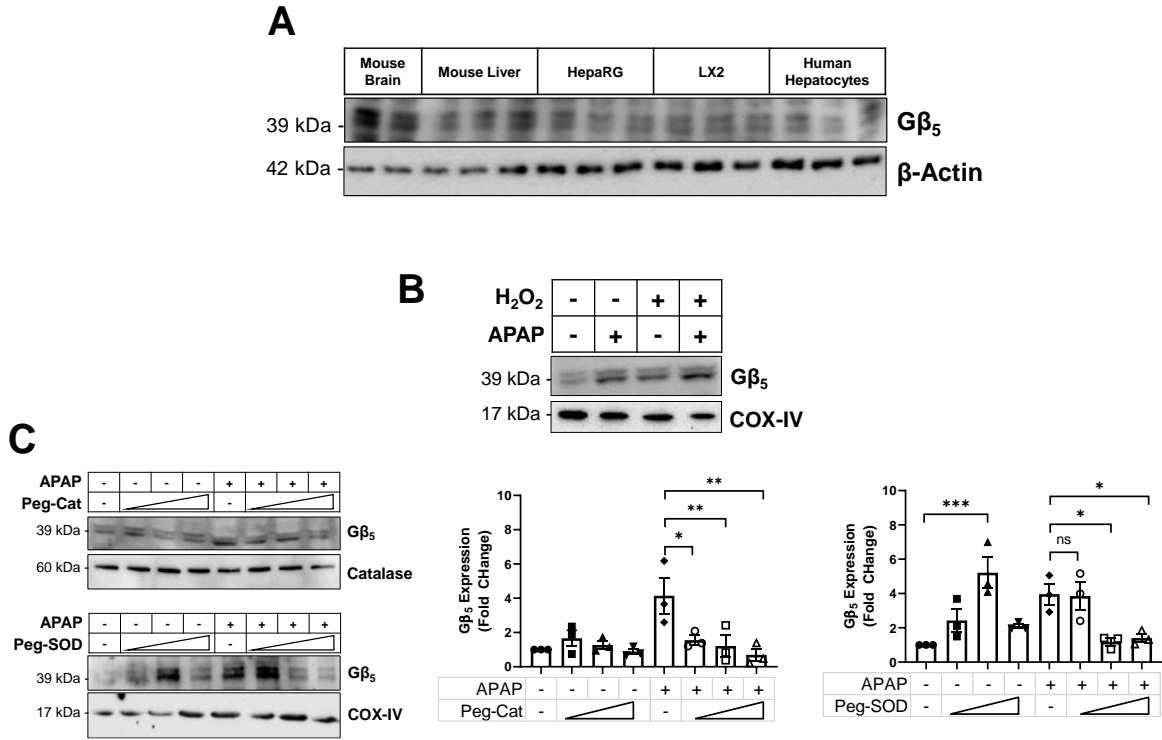

**Fig. S3. ROS accumulation drives Gβ<sub>5</sub> up-regulation in HepaRG cells.** (A) Gβ<sub>5</sub> expression in mouse brain and liver tissue, HepaRG cells, Lx2 cells and human hepatocytes. HepaRG cells were treated with APAP (5 mM) or hydrogen peroxide (H<sub>2</sub>O<sub>2</sub>; 200 mM) for 24 hours ± 1 hour pre-treatment with Peg-SOD (1000 U/mL) or Peg-Cat (200 U/mL). (A) Gβ<sub>5</sub> expression following ROS induction. (B) Gβ<sub>5</sub> expression following H<sub>2</sub>O<sub>2</sub> or superoxide scavenging (n=3). Catalase or COX-IV serve as loading controls. \**P*<0.05, \*\**P*<0.01, \*\*\**P*<0.001 via two-way ANOVA with Sidak's post-hoc test, respectively. Data are presented as mean ± SEM.

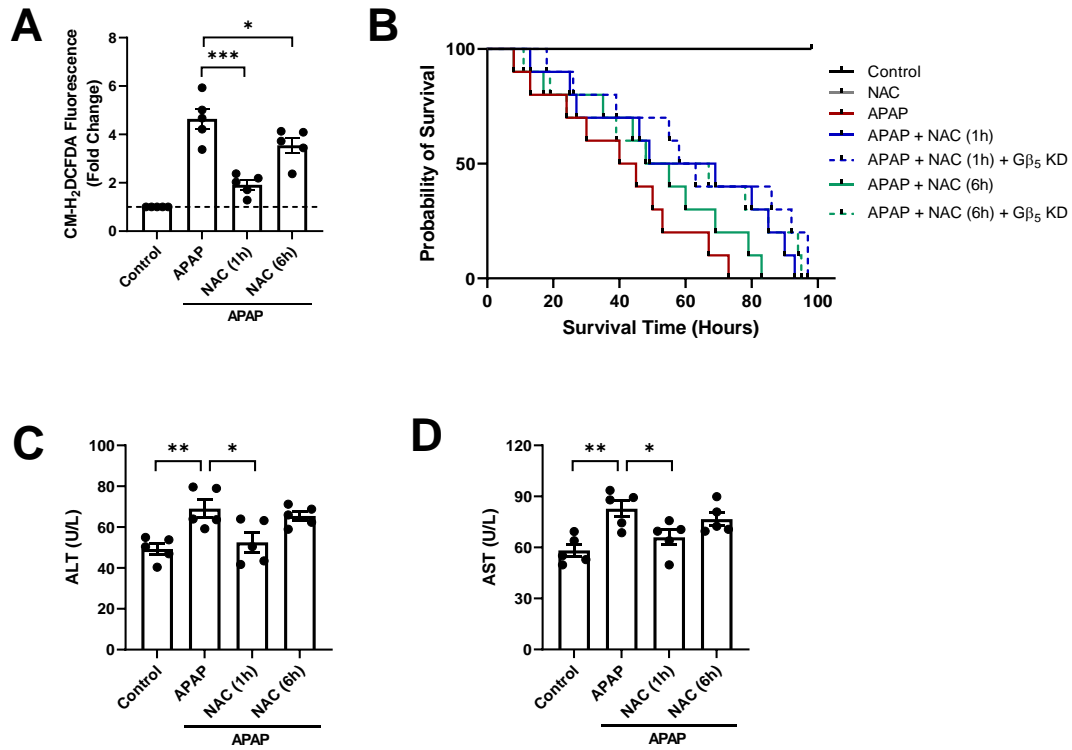

**Fig. S4. NAC efficacy in treating APAP-induced hepatotoxicity is limited to a narrow window immediately after treatment.** WT mice were administered vehicle (control) or APAP (350 mg/kg, i.p.) for 24 hours with or without NAC treatment (100 mg/kg, i.p.) at 1 or 6 hours post-APAP administration. (A) CM-H<sub>2</sub>DCFDA fluorescence (total ROS, n=5). (B) Kaplan-Meier survival curve (n=10). Hepatic (F) ALT and (G) AST (n=5). \**P*<0.05, \*\**P*<0.01, \*\*\**P*<0.001 via one-way ANOVA with Dunnett's post-hoc test. Data are presented as mean ± SEM.

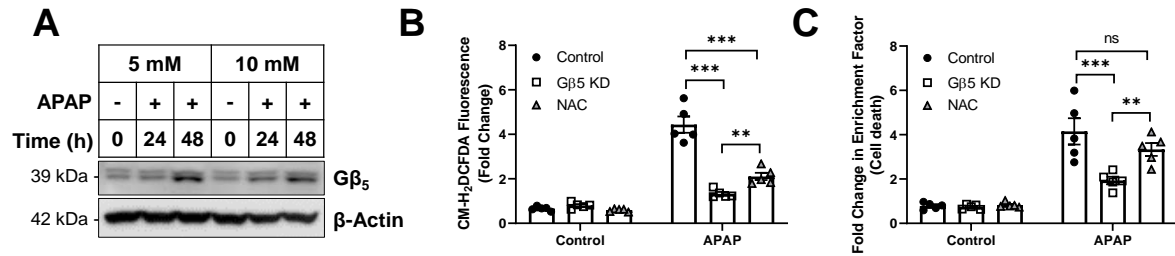

**Fig. S5. Gβ<sub>5</sub> knockdown shows an improved capacity to diminish APAP-induced ROS and cell death over NAC.** HepaRG cells expressing control or Gβ<sub>5</sub> shRNA were treated with APAP (5 mM or 10 mM) for 24 hours (or 48 where noted) ± NAC (5 mM). (A) Gβ<sub>5</sub> protein expression. (B) CM-H<sub>2</sub>DCFDA fluorescence (total ROS, n=5). (C) Cell death (fold increase in cytoplasmic histone-associated DNA fragments) (n=5). β-Actin serves as a loading control for immunoblots. ns = not significant. \*\**P*<0.01, \*\*\**P*<0.001 via two-way ANOVA with Sidak's post-hoc test. Data are presented as mean ± SEM.

**A**

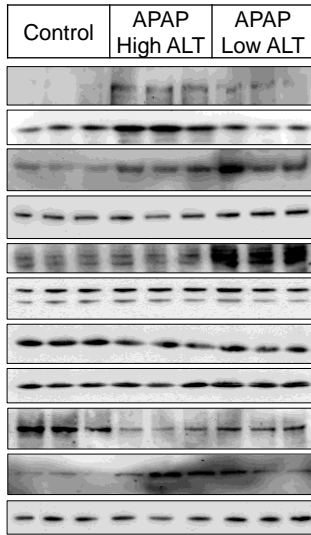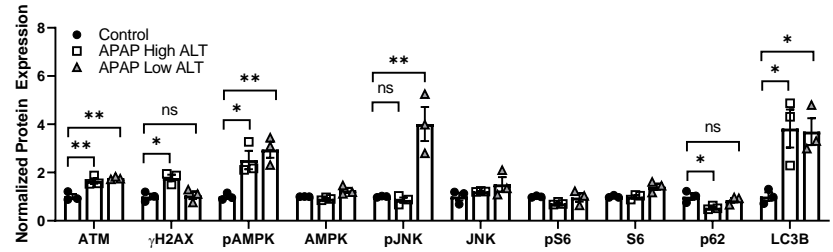

**B**

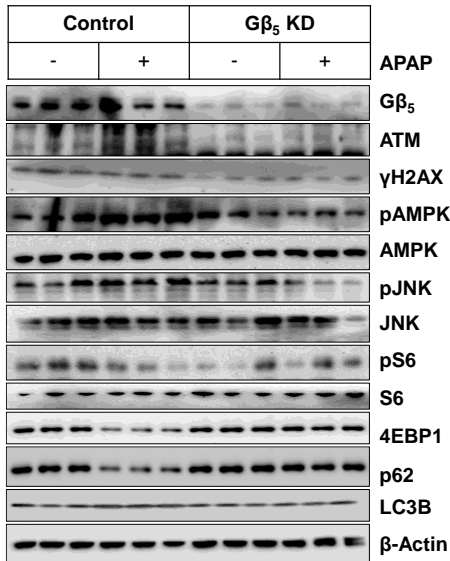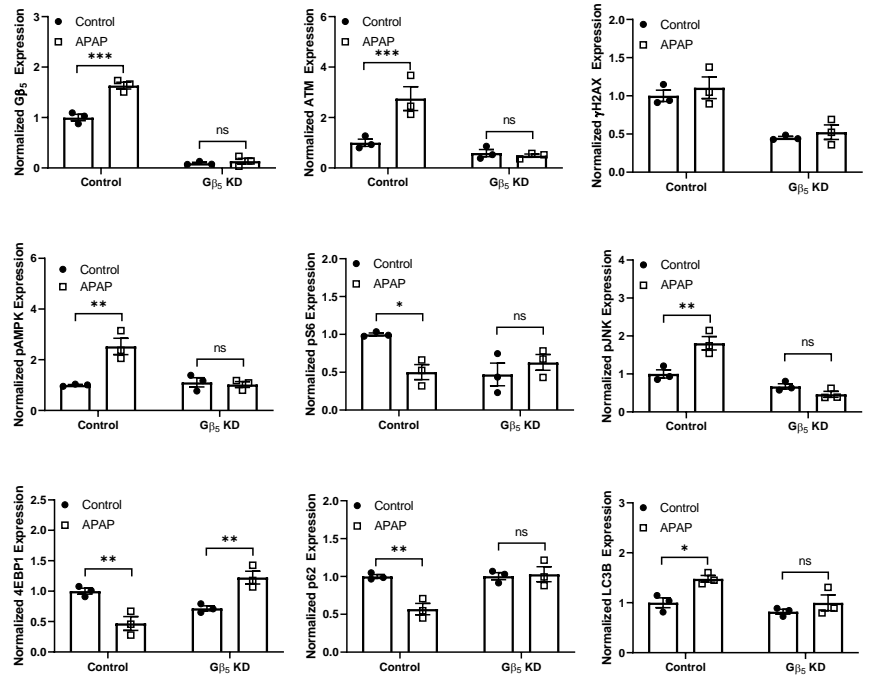

**Fig. S6. G $\beta$ <sub>5</sub> drives alterations in the ATM/AMPK/mTOR pathway and autophagy markers in primary human hepatocytes exposed to APAP.** (A) Liver tissue samples from APAP-induced liver injury patients were stratified based on injury severity and probed for expression of indicated proteins (n=3). (B) Primary human hepatocytes were transfected with control or G $\beta$ <sub>5</sub> shRNA. Cells were then treated APAP (5 mM) for 24 hours. Immunoblots were probed for expression of G $\beta$ <sub>5</sub>, ATM and its effectors, and markers of autophagy and quantified (n=3).  $\beta$ -Actin serves as a loading control for all immunoblots. ns = not significant. \* $P$ <0.05, \*\* $P$ <0.01, \*\*\* $P$ <0.001 via one-way or two-way ANOVA with Dunnett's or Sidak's post-hoc test, respectively. Data are presented as mean  $\pm$  SEM.



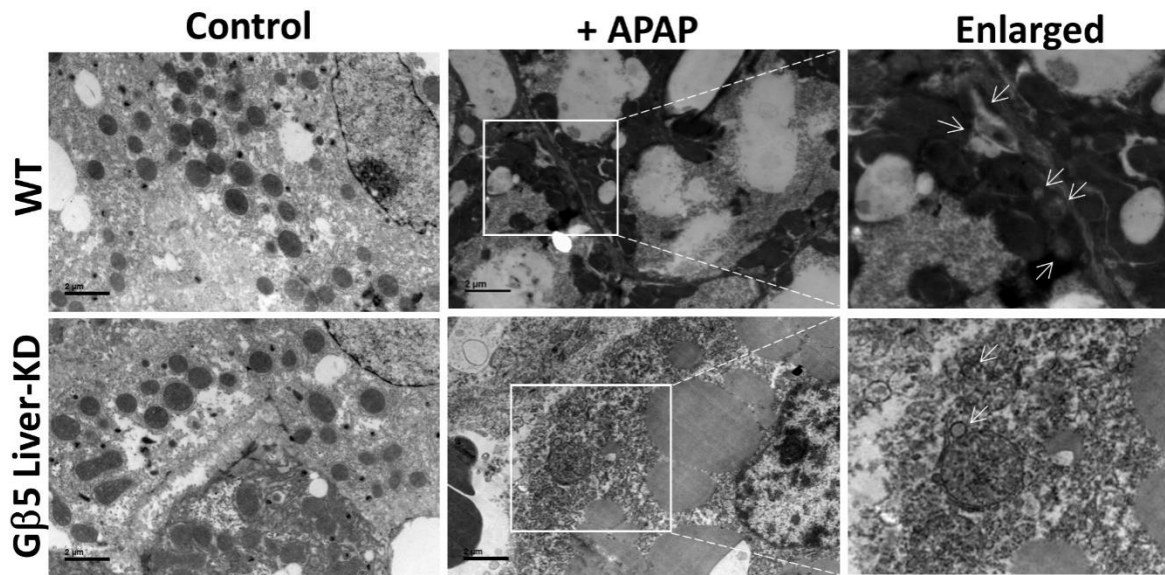

**Fig. S7.  $G\beta_5$  knockdown impacts autophagic flux in APAP-treated liver.** Control and  $G\beta_5$  KD mice were given a single APAP dose (350 mg/kg, i.p.) and liver tissue processed after 48 hours using transmission electron microscopy (TEM). Control samples (WT and  $G\beta_5$  KD) showed typically dispersed mitochondria and intact nuclei. In APAP treated WT liver, the formation of large vacuoles compressed cellular organelles resulting in the formation of autophagic vacuoles (autophagosomes) [circular bulging structures around the membrane marked with white arrows]. Vacuole formation was lessened in  $G\beta_5$  KD samples.

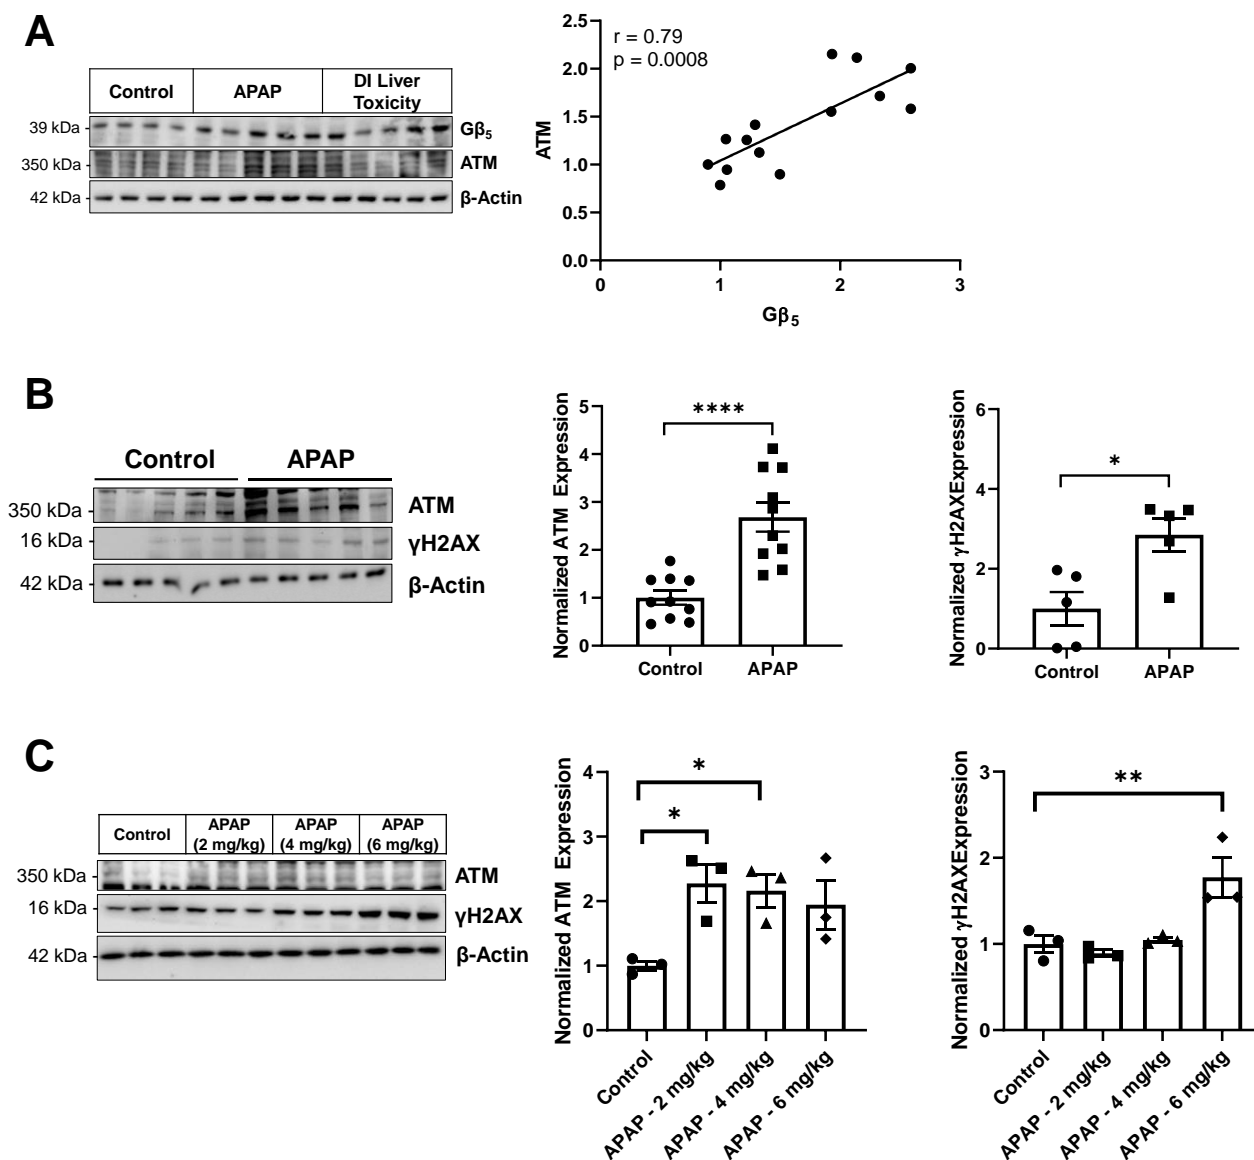

**Fig. S8. ATM and Gβ<sub>5</sub> protein expression are highly correlated in liver.** (A) Immunoblotting was performed for Gβ<sub>5</sub> and ATM in livers from APAP-induced liver injury and DILI. Pearson's correlation coefficient between Gβ<sub>5</sub> and ATM is displayed with corresponding *P*-value. (B) ATM and γH2AX protein expression following (B) acute (350 mg/kg, i.p., 48 hours) or (C) chronic (2-6 mg/kg, i.p., 6 weeks) APAP administration. β-Actin serves as a loading control for all immunoblots. \**P*<0.05, \*\**P*<0.01, \*\*\*\**P*<0.0001 via one-way ANOVA with Sidak's post-hoc test. Data are presented as mean ± SEM.

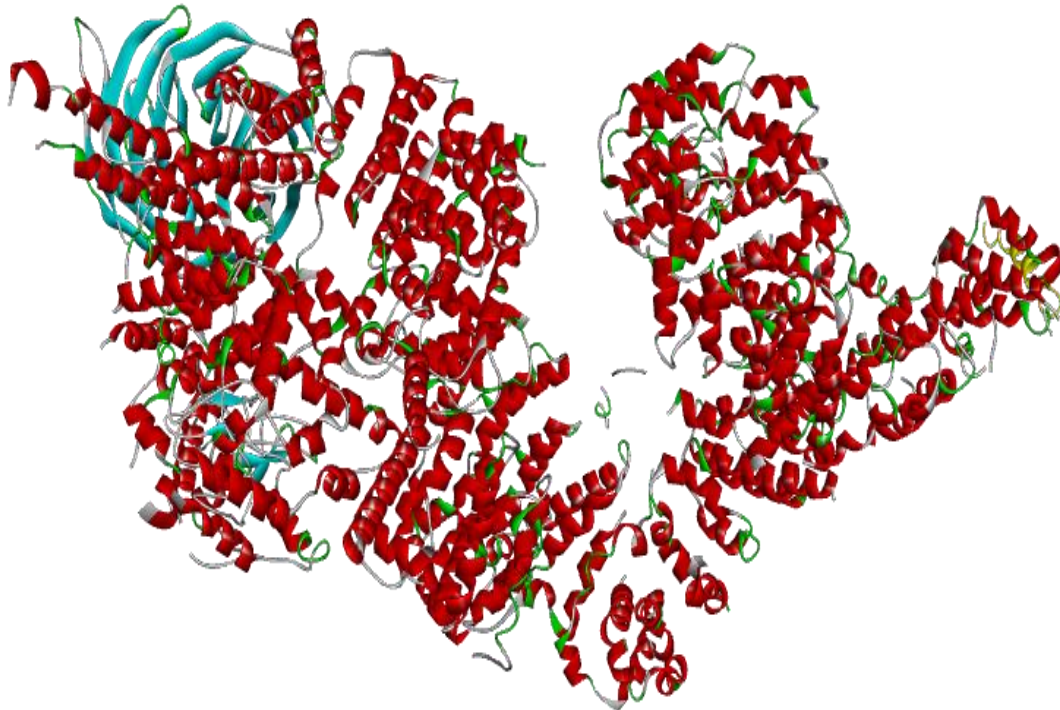

**Fig. S9. Computational Modeling of a putative ATM-G $\beta_5$  complex.** The model was generated based on previously published crystal structures for human ATM (PDB ID: 5NP1; Red) and mouse G $\beta_5$  (PDB ID: 2PBI; turquoise).

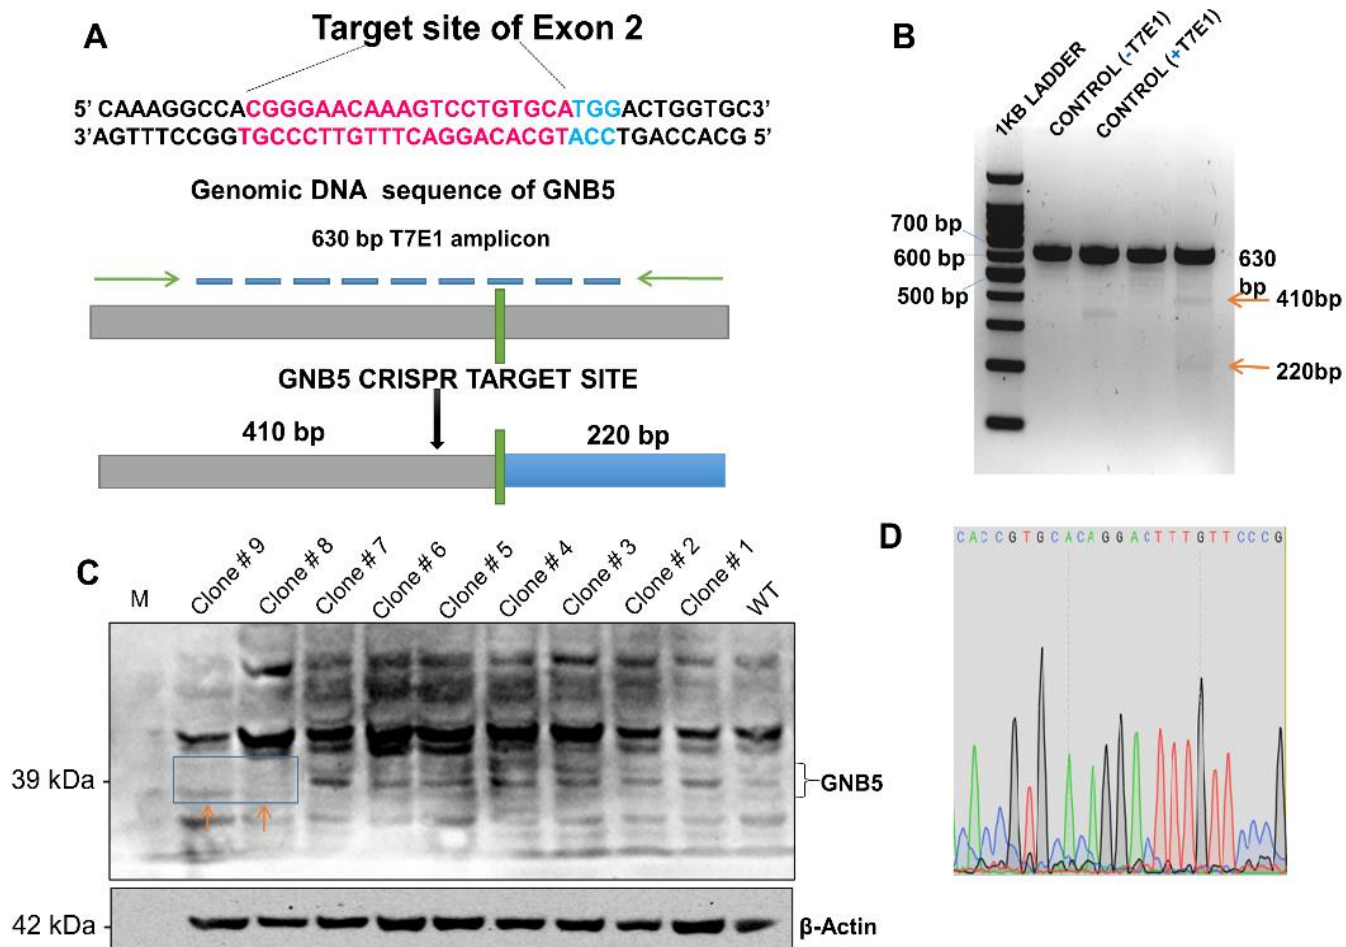

**Fig. S10. Validation of  $G\beta_5$  knockout in HepaRG cells via CRISPR/Cas9-dependent genomic excision.** (A) Design of excision site in the *GNB5* gene overlaid with predicted products from T7E1 validation assay. (B) Results from T7E1 assay depicting expected 410 and 220 base pair (bp) products. (C) Validation of CRISPR/Cas9 clones 1-9 demonstrating successful gene knockout in clones 8 and 9. (D) Sequencing chromatogram of  $G\beta_5$  oligo which has been inserted in PX459 CRISPR plasmid.

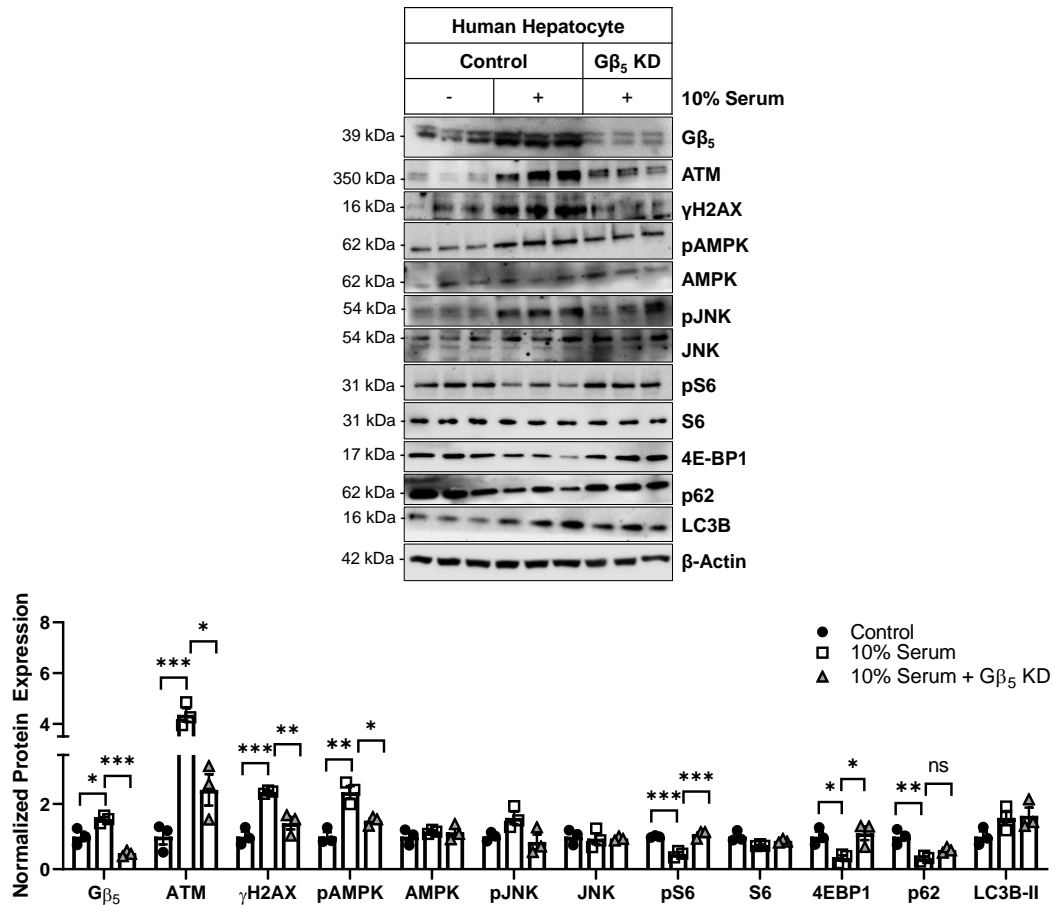

**Fig. S11. Gβ<sub>5</sub> drives alterations in the ATM/AMPK/mTOR pathway and autophagy markers in primary human hepatocytes exposed to serum from APAP-induced liver injury patients.** Cells were transfected with control or Gβ<sub>5</sub> shRNA. Cells were then treated with 10% serum isolated from human patients diagnosed with APAP hepatotoxicity for 24 hours. Immunoblots were probed for expression of Gβ<sub>5</sub>, ATM and its effectors, and markers of autophagy and quantified (n=3). β-Actin serves as a loading control for all immunoblots. ns = not significant. \**P*<0.05, \*\**P*<0.01, \*\*\**P*<0.001 via one-way ANOVA with Dunnett's post-hoc test. Data are presented as mean ± SEM.

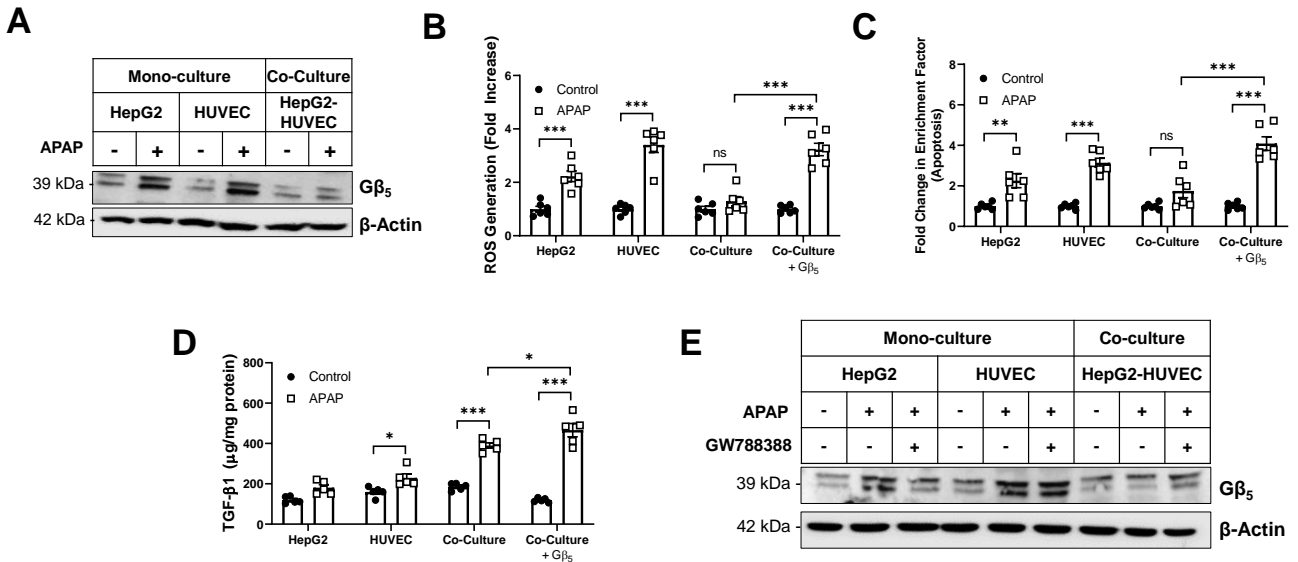

**Fig. S12. G $\beta_5$  expression determines susceptibility of hepatocyte-endothelial cell co-cultures to APAP toxicity.** HepG2 hepatocyte or HUVEC endothelial cell mono-cultures or co-cultures were treated with APAP (5 mM, 24 hours) after transfection with G $\beta_5$ -expressing constructs. (A) G $\beta_5$  protein expression. (B) CM-H<sub>2</sub>DCFDA fluorescence (total ROS, n=5). (C) Cell death (fold increase in histone-associated DNA fragments; n=5). (D) TGF- $\beta$ 1 content. (E) G $\beta_5$  protein expression  $\pm$  TGF- $\beta$  receptor 1 (TGF- $\beta$ R1) inhibitor GW788388 (5  $\mu$ M) pre-treatment (1 hour).  $\beta$ -Actin serves as a loading control for all immunoblots. ns = not significant. \* $P$ <0.05, \*\* $P$ <0.01, \*\*\* $P$ <0.001 via two-way ANOVA with Sidak's post-hoc test. Data are presented as mean  $\pm$  SEM.

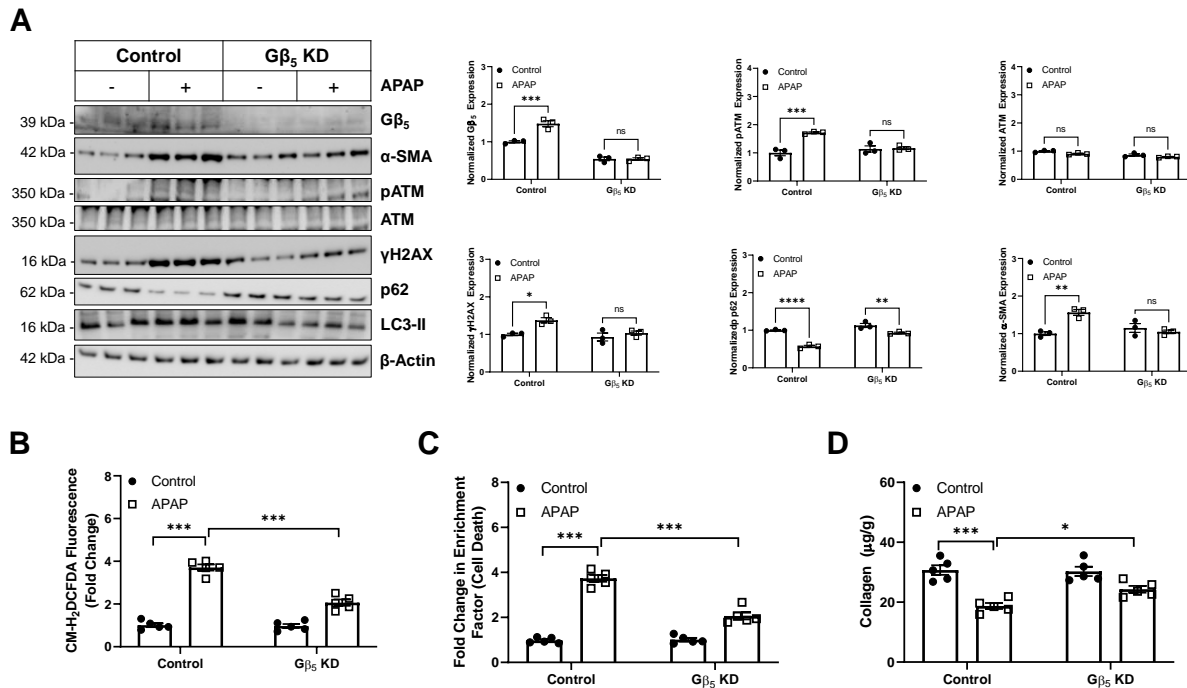

**Fig. S13. Gβ<sub>5</sub> knockdown improves APAP-dependent pathological endpoints in hepatic stellate cells.** LX2 cells expressing control or Gβ<sub>5</sub> shRNA were treated with APAP (5 mM) for 24 hours. (A) Immunoblots for Gβ<sub>5</sub>, pATM, ATM, γH2AX, α-SMA, p62, and LC3-II were quantified (n=3). (B) CM-H<sub>2</sub>DCFDA fluorescence (total ROS, n=5). (C) Cell death (fold increase in cytoplasmic histone-associated DNA fragments) (n=5). (D) Collagen content (n=5). β-Actin serves as a loading control for immunoblots. ns = not significant. \**P*<0.05, \*\**P*<0.01, \*\*\**P*<0.001 via two-way ANOVA with Sidak's post-hoc test. Data are presented as mean ± SEM.

**Supplemental Table 1: Reagent List**

| <b>Company</b>               | <b>Location</b>       | <b>Reagent</b>                                                                                                                                                                                                                                       |
|------------------------------|-----------------------|------------------------------------------------------------------------------------------------------------------------------------------------------------------------------------------------------------------------------------------------------|
| Sigma Chemical               | St. Louis, MO,<br>USA | Acetaminophen<br>Ru360<br>Cyclosporin A<br>CM-H2DCFDA<br>Oil Red O<br>Leupeptin<br>Torin 1<br>MG132<br>Polyethylene glycol-superoxide dismutase- (Peg-SOD)<br>Polyethylene glycol-catalase (Peg-Cat)<br>Collagenase IV<br>Type I collagen<br>MHY1485 |
| Addgene                      | Watertown, MA,<br>USA | pLenti CMV Puro DEST cloning vector<br>pMD2.G VSV-G envelope expressing plasmid<br>psPAX2<br>PX459 CRISPR system plasmid                                                                                                                             |
| Tocris<br>Biosciences        | Bristol, UK           | GW788388                                                                                                                                                                                                                                             |
| Abcam                        | Cambridge, UK         | Masson Trichrome Stain<br>N-acetyl cysteine (NAC)<br>KU-55933<br>Acridine Orange Stain<br>Protein A/G sepharose<br>Sirius Red                                                                                                                        |
| Thermo Fisher<br>Scientific  | Waltham, MA,<br>USA   | MitoSox<br>Phusion Hot Start II High-Fidelity PCR Master Mix (F-565S)                                                                                                                                                                                |
| Invitrogen                   | Carlsbad, CA,<br>USA  | Platinum Taq DNA Polymerase High Fidelity                                                                                                                                                                                                            |
| Takara Bio                   | Kyoto, Japan          | pMD20-T vector                                                                                                                                                                                                                                       |
| Sisco Research<br>Laboratory | Mumbai, India         | Hematoxylin<br>Eosin                                                                                                                                                                                                                                 |



**Supplemental Table 2: Antibody List**

| <b>Company</b>            | <b>Location</b>     | <b>Antibody</b>          | <b>Catalog #</b> | <b>Dilution</b>          |
|---------------------------|---------------------|--------------------------|------------------|--------------------------|
| Santacruz Biotech         | Dallas, TX, USA     | $\alpha$ Tubulin         | SC58667          | WB (1:1000)              |
|                           |                     | Cytochrome C             | SC13156          | WB (1:800)               |
|                           |                     | $\beta$ -Actin           | SC47778          | WB (1:1000)              |
| Abcam                     | Cambridge, UK       | PCNA                     | ab29             | WB (1:1000), IHC (1:200) |
|                           |                     | F4/80                    | ab6640           | WB (1:1000), IHC (1:200) |
|                           |                     | ATM                      | ab78             | WB (1:800)               |
|                           |                     | p-ATM                    | CST45265         | WB (1:1000)              |
|                           |                     | $\gamma$ H2AX            | ab124781         | WB (1:1000)              |
|                           |                     | $\gamma$ H2AX            | ab26350          | WB (1:1000)              |
|                           |                     | 4EBP1                    | ab2606           | WB (1:1000)              |
|                           |                     | Lamp-1                   | ab24170          | WB (1:1000)              |
|                           |                     | LC3-II                   | ab48394          | WB (1:1000)              |
|                           |                     | COX-IV                   | ab202554         | WB (1:1000)              |
|                           |                     | Mouse Secondary-HRP      | ab97023          | WB (1:2000), IHC (1:500) |
| Rabbit Secondary-HRP      | ab97051             | WB (1:2000), IHC (1:500) |                  |                          |
| Cell Signaling Technology | Danvers, MA, USA    | SQSTM1/p62               | ab56416          | WB (1:1000)              |
|                           |                     | Ubiquitin                | ab179434         | WB (1:1000)              |
|                           |                     | SAPK/JNK                 | 9252S            | WB (1:1000)              |
|                           |                     | p-SAPK/JNK               | 9255S            | WB (1:1000)              |
|                           |                     | Catalase                 | 129805           | WB (1:1000)              |
|                           |                     | $\beta$ -Actin           | 4970             | WB (1:1000)              |
|                           |                     | $\alpha$ -SMA            | 19245S           | WB (1:1000)              |
|                           |                     | AMPK                     | 2532S            | WB (1:1000)              |
|                           |                     | pAMPK                    | 2531S            | WB (1:750)               |
|                           |                     | pS6                      | 2211S            | WB (1:1000)              |
| S6                        | 2217S               | WB (1:1000)              |                  |                          |
| 4EBP1                     | 9644                | WB (1:1000)              |                  |                          |
| Millipore                 | Burlington, MA, USA | G $\beta$ 5              | ABS1062          | WB (1:800), IHC (1:200)  |
| Thermo Fisher Scientific  | Waltham, MA, USA    | ATM                      | MA12315<br>2     | WB (1:1000)              |

**Supplemental Table 3: Assay Kit List**

| Company                  | Location                  | Assay                                                                       | Catalog #  |
|--------------------------|---------------------------|-----------------------------------------------------------------------------|------------|
| Abcam                    | Cambridge, UK             | Ca <sup>2+</sup> Flux Assay Kit                                             | ab102505   |
|                          |                           | Albumin Assay Kit                                                           | ab235628   |
|                          |                           | Collagen Assay Kit                                                          | ab222942   |
|                          |                           | Hydroxyproline Assay Kit                                                    | ab222941   |
|                          |                           | Mitochondrial isolation Kit                                                 | ab110170   |
|                          |                           | Terminal deoxynucleotidyltransferase<br>dUTP Nick-End Labelling (TUNEL) kit | ab206386   |
| Promega                  | Madison, WI,<br>USA       | Mitochondrial ATP: ToxGlo™                                                  | G8000      |
| Thermo Fisher Scientific | Waltham, MA,<br>USA       | TGF-β1 ELISA                                                                | 88-8350-22 |
| Roche                    | San Francisco,<br>CA, USA | Cell Death Detection Kit                                                    | C755B93    |
| Erba<br>Mannheim         | London, UK                | ALT                                                                         | 120207     |
|                          |                           | AST                                                                         | 120204     |
|                          |                           | Triglycerides                                                               | 120211     |

**Supplemental Table 4: Cell Line List**

| Company                                                                                                                                                             | Location                         | Cell Line | Catalog # | Culture Conditions                                                                                                                   |
|---------------------------------------------------------------------------------------------------------------------------------------------------------------------|----------------------------------|-----------|-----------|--------------------------------------------------------------------------------------------------------------------------------------|
| Merck & Co.                                                                                                                                                         | Kenilworth, NJ,<br>USA           | HepaRG    | MMHPR116  | 37°C incubator at 5% CO <sub>2</sub> in William's E Medium with GlutaMAX™ Supplement (Thermo Fisher Scientific) with 10% FBS (Gibco) |
| Himedia Laboratories                                                                                                                                                | Mumbai,<br>Maharashtra,<br>India | HUVEC     |           | 37°C incubator at 5% CO <sub>2</sub> in DMEM + 10% FBS                                                                               |
| Gift from Dr. Jiaur Rahman Gayen,<br>CDRI, Lucknow, India                                                                                                           |                                  | HepG2     |           | 37°C incubator at 5% CO <sub>2</sub> in DMEM + 10% FBS                                                                               |
| Gift from Dr. Suvro Chatterjee,<br>Vascular Biology Lab, Life Sciences<br>Division, AU-KBC Research Centre,<br>Anna University, Chennai 600044,<br>Tamilnadu, India |                                  | Lx2       |           | 37°C incubator at 5% CO <sub>2</sub> in DMEM + 3% FBS                                                                                |

**Supplemental Table 5: Primer List**

| # | Names of Primer                | Sequence of Primer                  |
|---|--------------------------------|-------------------------------------|
| 1 | GNB5 Human full length Forward | 5'- ATACTCGAGATGGCAACCGAGGGGCT -3'  |
| 2 | GNB5 Human full length Reverse | 5'-ATAAAGCTTGGCCCAGACTCTGAGGGTAT-3' |

|    |                                                    |                                         |
|----|----------------------------------------------------|-----------------------------------------|
| 3  | GNB5 Human WD40-deletion Forward                   | 5'- ATACTCGAGATGGCAACCGAGGGGCT -3'      |
| 4  | GNB5 Human WD40-deletion Reverse                   | 5'-ATAAAGCTTGGTCTTCATGACAAACTGC-3'      |
| 5  | GNB5 Human 7WD40-deletion Forward                  | 5'- ATACTCGAGATGGCAACCGAGGGGCT -3'      |
| 6  | GNB5 Human 7WD40-deletion Reverse                  | 5'-ATAAAGCTTGGCCCAGACTCTGAGGGTAT-3'     |
| 7  | GNB5 Human 1-52aa. deletion Forward                | 5'- ATACTCGAGATGAAGACCAGAAGGACCCTCA -3' |
| 8  | GNB5 Human 1-52aa. deletion Reverse                | 5'-ATAAAGCTTGGCCCAGACTCTGAGGGTAT-3'     |
| 9  | GNB5 Human 56-200 aa. deletion Forward             | 5'- ATACTCGAGATGGCAACCGAGGGGCT -3'      |
| 10 | GNB5 Human 56-200 aa. deletion Reverse             | 5'-ATAAAGCTTGGCCCAGACTCTGAGGGTAT-3'     |
| 11 | GNB5 Human 103-300 aa. deletion Forward            | 5'- ATACTCGAGATGGCAACCGAGGGGCT -3'      |
| 12 | GNB5 Human 103-300 aa. deletion Reverse            | 5'-ATAAAGCTTGGCCCAGACTCTGAGGGTAT-3'     |
| 13 | GNB5 Mouse full length Forward                     | 5'-TATGCTAGCATGTGCGAT CAGACC TTCCT-3'   |
| 14 | GNB5 Mouse full length Reverse                     | 5'-TATAGATCTTGCCCA AACTCTTAGGGTGT3'     |
| 15 | GNB5 Sense Strand (ex2) CRISPR                     | 5'- CACCGTGCACAGGACTTTGTTCCCG-3'        |
| 16 | GNB5 Antisense Strand (ex2) CRISPR                 | 5'- AAACCGGGAACAAAGTCCTGTGCAC-3'        |
| 17 | T7E1 Assay Forward                                 | 5'- AAAGGGAATAATTTTATGTAGT-3'           |
| 18 | T7E1 Assay Reverse                                 | 5'- CCCAAATTATGAAGTTCTATAA-3'           |
| 19 | GNB5 Human Q50H point mutation overlapping Forward | 5'- AGGCCCTGGGGCACTTTGTCAT -3'          |
| 20 | GNB5 Human Q50H point mutation overlapping Reverse | 5'- TCTTCATGACAAAGTGCCCCAG -3'          |
| 21 | GNB5 Human K54T point mutation overlapping Forward | 5'- CAGTTTGTTCATGACGACCAGA -3'          |
| 22 | GNB5 Human K54T point mutation overlapping Reverse | 5'- GGCCTTCTGGTCGTCATGAC -3'            |
| 23 | GNB5 Human R56G point mutation overlapping Forward | 5'- TGTCATGAAGACCGGAAGGAC -3'           |
| 24 | GNB5 Human R56G point mutation overlapping         | 5'- TTGAGGGTCCTTCCGGTCTTC -3'           |

|    |                                                     |                               |
|----|-----------------------------------------------------|-------------------------------|
|    | Reverse                                             |                               |
| 25 | GNB5 Human W107R point mutation overlapping Forward | 5'- CATGCCCTGCACGAGGGTGAT -3' |
| 26 | GNB5 Human W107R point mutation overlapping Reverse | 5'- ATGCCATCACCCCTCGTGCAG -3' |
| 27 | GNB5 Human D241A point mutation overlapping Forward | 5'- CACATGAATCTGCCATCAAC -3'  |
| 28 | GNB5 Human D241A point mutation overlapping Reverse | 5'- GACACTGTTGATGGCAGATTC -3' |
| 29 | GNB5 Human Y305D point mutation overlapping Forward | 5'- TGGATACAATGATGACACTAT -3' |
| 30 | GNB5 Human Y305D point mutation overlapping Reverse | 5'- CGTTGATAGTGTCATCATTG -3'  |

**Supplemental Table 6:** Clinical summary data for all liver injury patient samples utilized for the study

| Patient Demographics |              | All patients | Hepato-cellular Injury | Cholestatic Injury | APAP Injury  | Mixed Injury |
|----------------------|--------------|--------------|------------------------|--------------------|--------------|--------------|
|                      | n            | 31           | 10                     | 7                  | 6            | 8            |
|                      | Age (y)      | 29-68        | 31-62                  | 49-57              | 43-61        | 29-68        |
|                      | Gender (F/M) | 16/15        | 5/5                    | 3/4                | 2/4          | 6/2          |
|                      | ALT (U/L)    | 256.5 ± 16.9 | 301.9 ± 43.2           | 249.2 ± 30.8       | 260.9 ± 28.7 | 208.7 ± 19.2 |
|                      | AST (U/L)    | 269.2 ± 19.4 | 189.2 ± 24.6           | 382.1 ± 38         | 327.9 ± 30.4 | 214.6 ± 17.6 |
|                      | TBIL         | 7.5 ± 0.25   | 6.9 ± 0.46             | 8.3 ± 0.46         | 8.1 ± 0.64   | 7.2 ± 0.42   |

| Severity, n(%) |          |            |        |           |           |          |
|----------------|----------|------------|--------|-----------|-----------|----------|
|                | Mild     | 12 (38.71) | 4 (40) | 2 (28.57) | 2 (33.33) | 4 (50.0) |
|                | Moderate | 15 (48.39) | 4 (40) | 3 (42.86) | 4 (66.67) | 4 (50.0) |
|                | Severe   | 4 (12.90)  | 2 (20) | 2 (28.57) | 0 (0)     | 0 (0)    |
|                | Fatal    | 0 (0)      | 0 (0)  | 0 (0)     | 0 (0)     | 0 (0)    |

**Supplemental Table 7:** Individual patient history for all liver injury patient samples utilized for the study

| Patient | Sex    | Age | Patient history                                                                                               | Liver Injury Category | ALT (U/L) | AST (U/L) | TBIL |
|---------|--------|-----|---------------------------------------------------------------------------------------------------------------|-----------------------|-----------|-----------|------|
| 1       | Male   | 54  | Vascular congestion, periportal chronic nonspecific inflammatory cell infiltration, early fatty liver changes | Hepatocellular        | 190.68    | 156.76    | 5.7  |
| 2       | Male   | 49  | Drug induced liver damage                                                                                     | Cholestatic           | 356.68    | 526.67    | 6.9  |
| 3       | Female | 56  | Sinusoidal congestion, cholestatic injury                                                                     | Cholestatic           | 299.12    | 310.57    | 9.4  |
| 4       | Female | 61  | Steatohepatitis                                                                                               | Hepatocellular        | 510.59    | 311.32    | 9.1  |
| 5       | Female | 38  | Early fatty liver changes, h/o taking antidepressants                                                         | Hepatocellular        | 283.39    | 273.68    | 6.5  |
| 6       | Male   | 31  | Fatty liver                                                                                                   | Hepatocellular        | 421.76    | 242.78    | 6.2  |
| 7       | Male   | 29  | Obese and hypertension, fatty liver                                                                           | Mixed                 | 218.16    | 210.56    | 6.7  |
| 8       | Female | 33  | H/O taking antipsychotics, fatty liver                                                                        | Mixed                 | 233.76    | 223.45    | 8.2  |
| 9       | Male   | 59  | Pericardial injury, ventricular hypertrophy, fatty liver changes                                              | Mixed                 | 174.89    | 157.75    | 9.1  |
| 10      | Male   | 68  | Fatty liver, death due myocardial infarction                                                                  | Mixed                 | 243.71    | 190.67    | 6.8  |
| 11      | Male   | 41  | Early fatty liver changes                                                                                     | Cholestatic           | 201.47    | 413.56    | 7.9  |
| 12      | Female | 45  | H/O taking NSAIDs and antidepressants, fatty liver                                                            | Mixed                 | 199.48    | 276.59    | 5.4  |
| 13      | Female | 40  | Early fatty liver changes, left ventricular hypertrophy, atheroma and h/o taking antidepressants              | Mixed                 | 135.38    | 203.41    | 7.5  |
| 14      | Male   | 49  | Cirrhosis of liver and h/o taking acetaminophen                                                               | APAP                  | 378.98    | 406.84    | 5.9  |
| 15      | Male   | 55  | Hepatocellular injury                                                                                         | Hepatocellular        | -         | -         | -    |

|    |        |    |                                                |                |        |        |      |
|----|--------|----|------------------------------------------------|----------------|--------|--------|------|
| 16 | Male   | 32 | Suicidal hanging, fatty liver                  | Mixed          | 157.38 | 168.47 | 6.1  |
| 17 | Female | 67 | Fibrosis of liver and h/o taking NSAIDs        | Mixed          | 306.45 | 300.51 | 7.8  |
| 18 | Male   | 52 | Cholestatic injury with cardiac fibrosis       | Cholestatic    | 310.39 | 378.64 | 10.4 |
| 19 | Female | 38 | Hepatic malignancy                             | Hepatocellular | 411.39 | 199.67 | 4.6  |
| 20 | Male   | 55 | Steatohepatitis                                | Hepatocellular | 331.66 | 167.86 | 8.4  |
| 21 | Male   | 49 | Alcoholic hepatitis                            | Hepatocellular | 279.90 | 146.57 | 7.6  |
| 22 | Female | 62 | Hemochromatosis                                | Hepatocellular | 157.70 | 103.41 | 6.8  |
| 23 | Female | 48 | Sinusoidal congestion and drug induced changes | Cholestatic    | 271.45 | 478.08 | 7.3  |
| 24 | Male   | 39 | Hepatitis B                                    | Cholestatic    | 135.37 | 233.79 | 8.6  |
| 25 | Male   | 57 | Cirrhosis of liver                             | Cholestatic    | 169.90 | 333.66 | 7.8  |
| 26 | Male   | 45 | Steatohepatitis - acetaminophen                | APAP           | 207.69 | 414.46 | 10.6 |
| 27 | Female | 61 | Steatohepatitis - acetaminophen                | APAP           | 311.65 | 319.75 | 8.9  |
| 28 | Male   | 53 | Cirrhosis of liver and taking acetaminophen    | APAP           | 199.68 | 214.67 | 7.4  |
| 29 | Male   | 51 | Steatohepatitis - acetaminophen                | APAP           | 241.58 | 295.67 | 8.1  |
| 30 | Female | 49 | Hepatocellular injury                          | Hepatocellular | 129.69 | 100.53 | 7.1  |
| 31 | Female | 43 | Cirrhosis of liver and taking acetaminophen    | APAP           | 225.74 | 315.78 | 7.6  |

**Supplemental Table 8:** Amino acid interactions from ATM-G $\beta$ <sub>5</sub> interaction study

| <b>GNB5 (B chain amino acids)</b> | <b>No. of Interactions</b> |
|-----------------------------------|----------------------------|
| B:GLN50                           | 37                         |
| B:LYS54                           | 32                         |
| B:ARG56                           | 57                         |
| B:TRP107                          | 29                         |
| B:ASP241                          | 27                         |
| B:TYR305                          | 24                         |

| <b>ATM (A chain amino acids)</b> | <b>No. of Interactions</b> |
|----------------------------------|----------------------------|
| A:ALA2525                        | 28                         |
| A:ARG2526                        | 23                         |
| A:ASP2214                        | 22                         |
| A:ASP1693                        | 21                         |
| A:PRO2518                        | 20                         |

|           |    |
|-----------|----|
| A:CYS2021 | 19 |
|-----------|----|
